# Supplementary material
Source: publisher figshare collection journal article supplement (https://sage.figshare.com/ndownloader/files/17709875)

# Online Appendix

## A1: Descriptive statistics for the raters

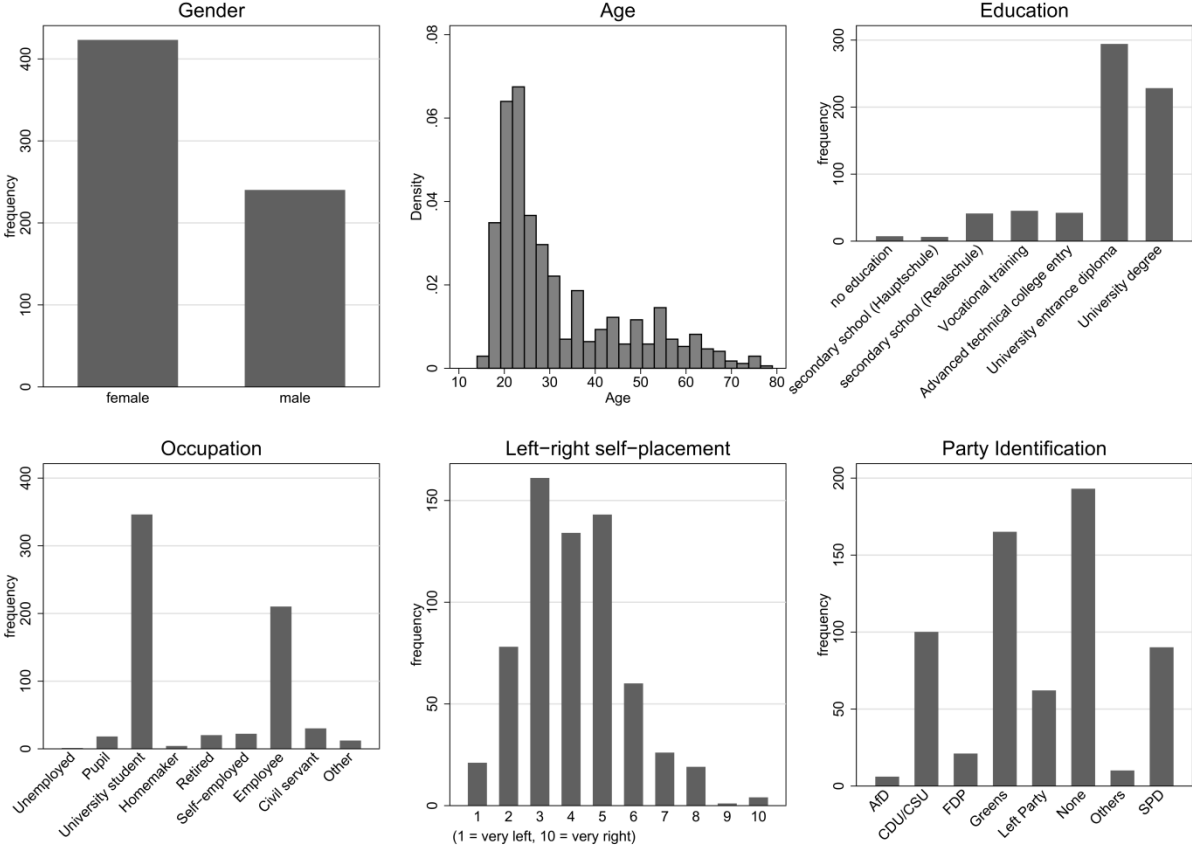

**A2: Determinants of attractiveness, competence and likability (regular background)**

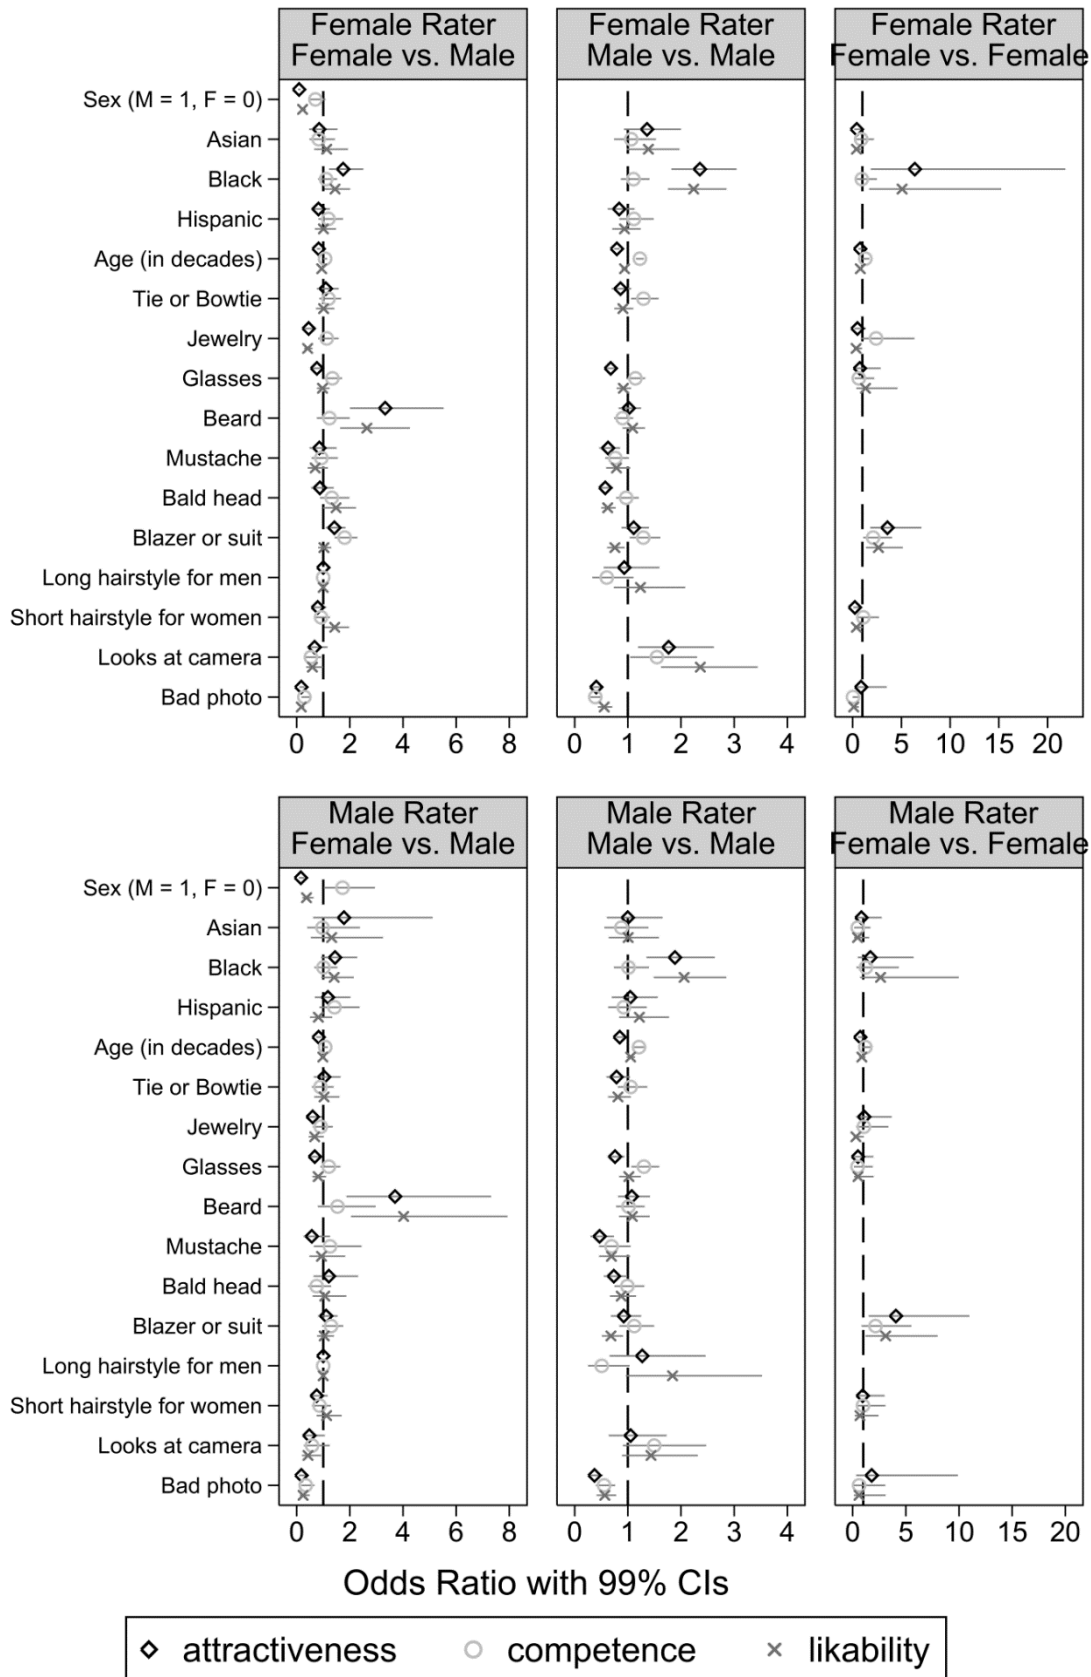

**A3: Determinants of attractiveness, competence and likability (uniform background)**

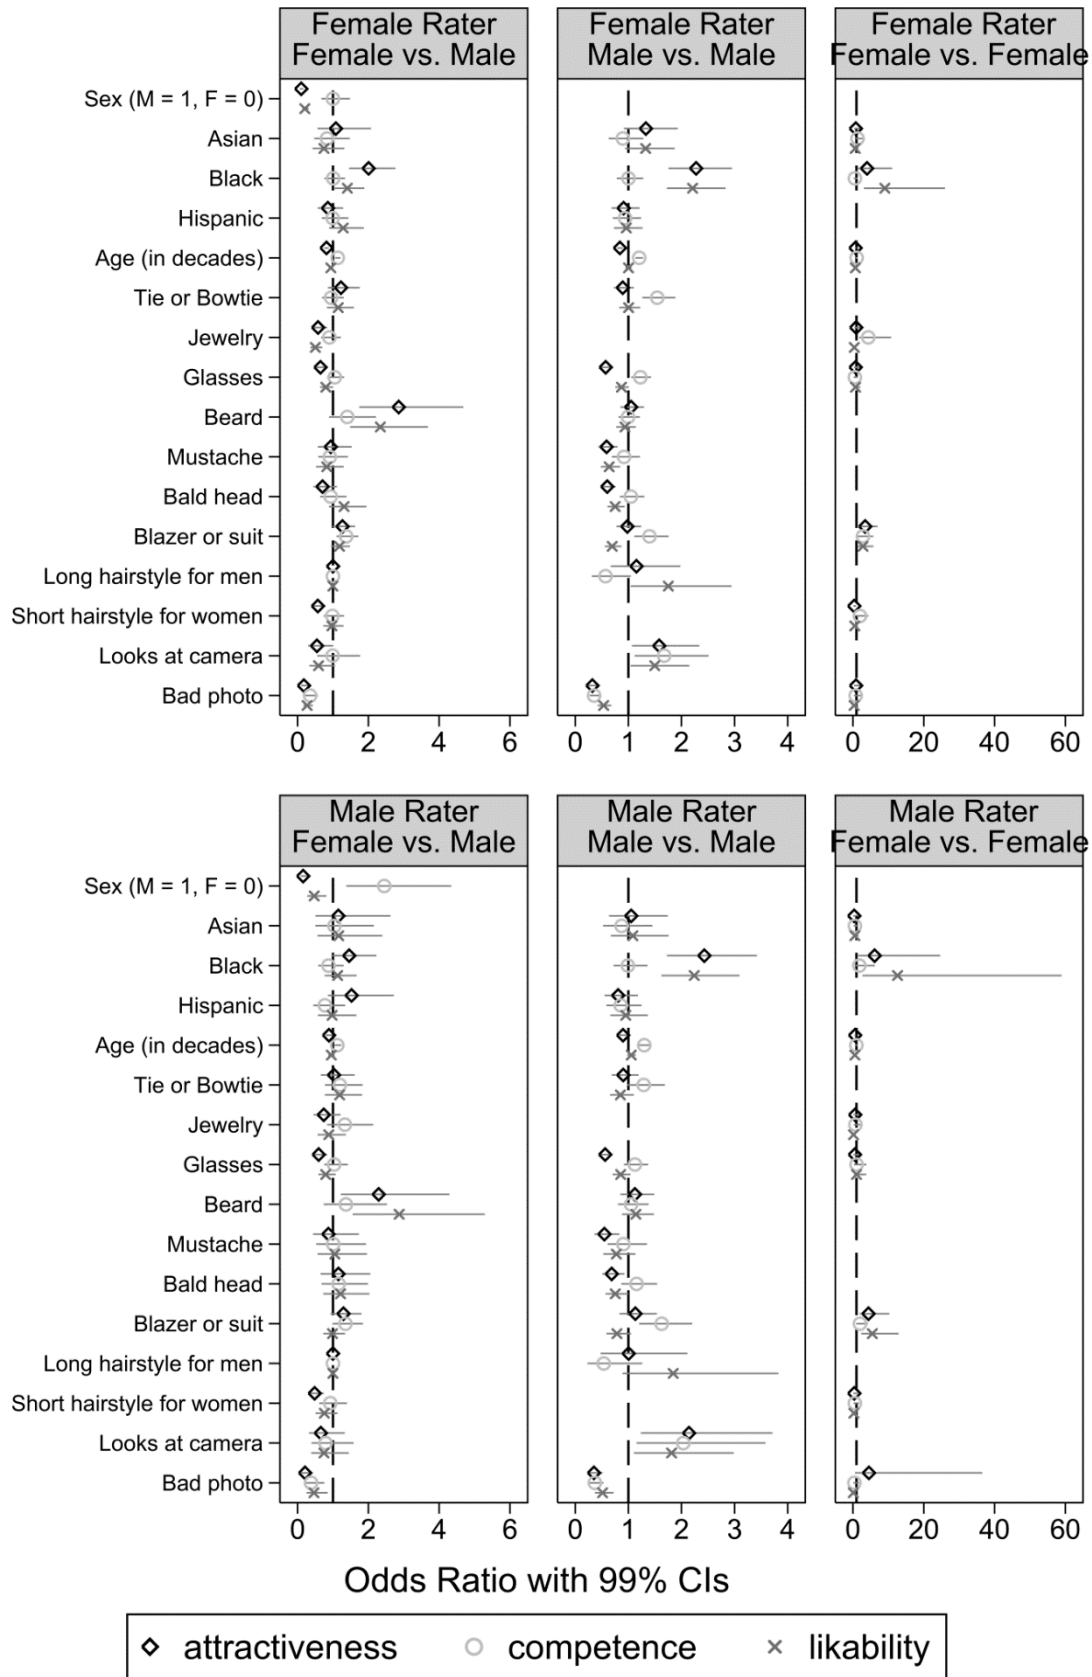

**A4: Determinants of attractiveness, competence and likability (young vs. old raters)**

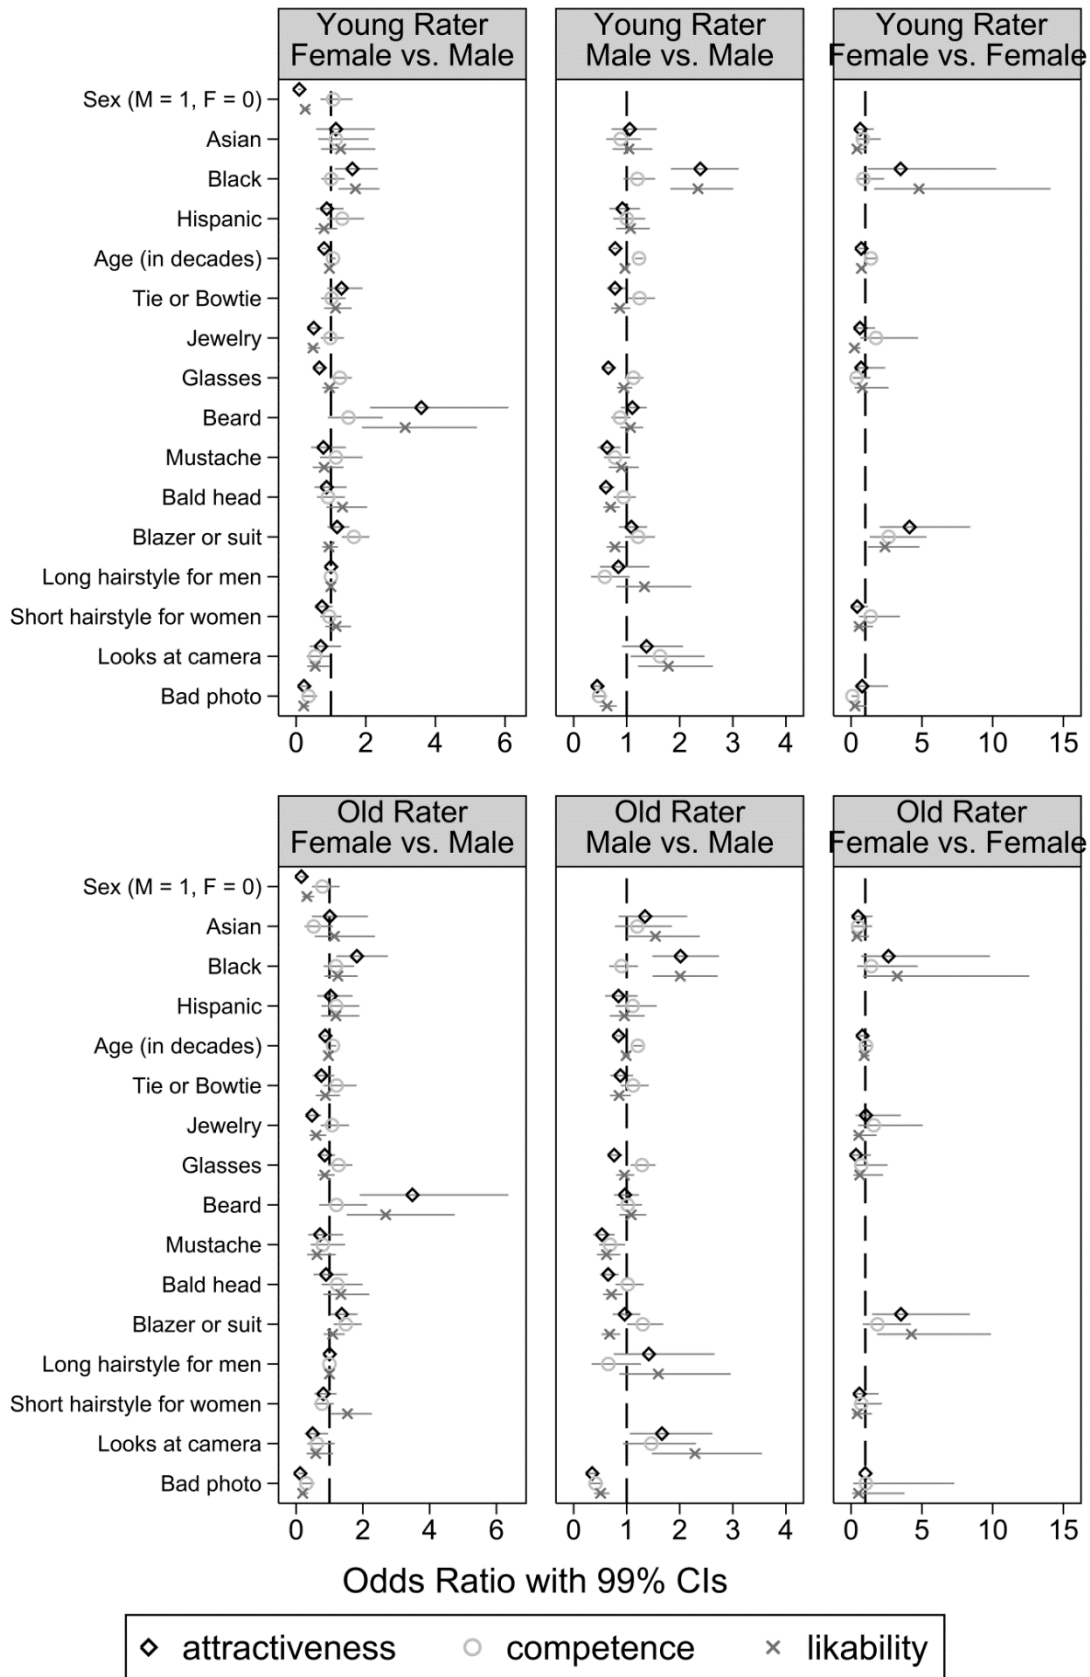

**A5: Determinants of attractiveness, competence and likability (left vs. right raters)**

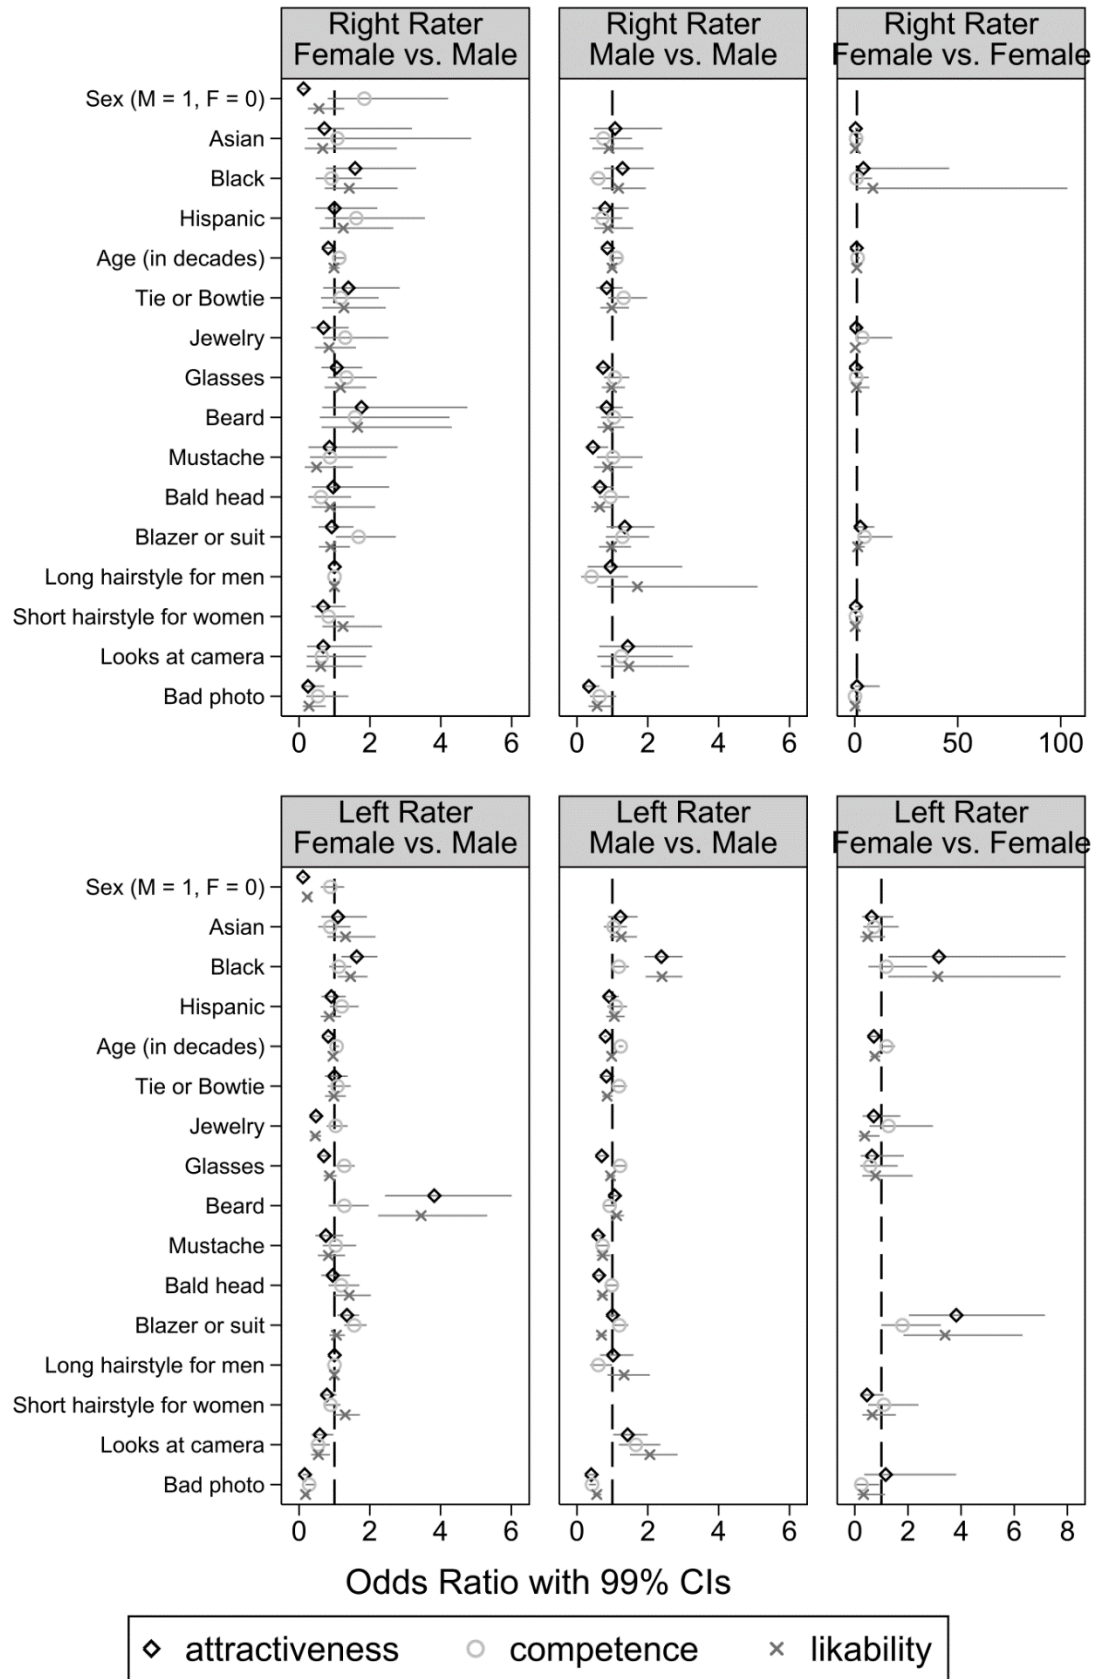

## A6: Ambiguity weighting by latency times

The fastest click of each rater is assigned a weighting factor of 1.0 while the slowest click gets a weight of 0.2. The final weighted proportion of clicks for candidate A in district X computes as follows:

$$p_{A,X} = \frac{\sum_{i=1}^{n_X} (r(A)_{i,X} \cdot w_{i,X})}{\sum_{i=1}^{n_X} (w_{i,X})}$$

with:  $n_X$  = number of ratings in district  $X$

$w_{i,X}$  = weight for rating  $i$  in district  $X$

$r(A)_{i,X}$  = rating  $i$  for candidate  $A$  in district  $X$  (i.e. 0 or 1);

### A7: Variable overview (all variables measure on the level of the electoral district, N = 401)

| Variable                                     | operationalization                                                                                                                                                                                                                           | min / max                                                                           | mean (sd)                       |
|----------------------------------------------|----------------------------------------------------------------------------------------------------------------------------------------------------------------------------------------------------------------------------------------------|-------------------------------------------------------------------------------------|---------------------------------|
|                                              |                                                                                                                                                                                                                                              | For dummies: % of cases                                                             |                                 |
| Dependent Variable                           | Vote share winner – vote share runner up in the House election on November 8                                                                                                                                                                 | 0 / 100                                                                             | 32.142 (18.640)                 |
| Attractiveness (picture set1)                | Latency weighted mean of clicks for the winning candidate compared to the runner-up. Appearance ratings based on pictures with regular background.                                                                                           | 0 / 1                                                                               | 0.529 (0.279)                   |
| Competence (picture set1)                    |                                                                                                                                                                                                                                              | 0.202 / 1                                                                           | 0.564 (0.202)                   |
| Likability (picture set1)                    |                                                                                                                                                                                                                                              | 0.050 / 1                                                                           | 0.513 (0.225)                   |
| Attractiveness (picture set2)                | Latency weighted mean of clicks for the winning candidate compared to the runner-up. Appearance ratings based on pictures with uniform slate-grey background.                                                                                | 0 / 1                                                                               | 0.540 (0.290)                   |
| Competence (picture set2)                    |                                                                                                                                                                                                                                              | 0 / 1                                                                               | 0.586 (0.208)                   |
| Likability (picture set2)                    |                                                                                                                                                                                                                                              | 0.023 / 1                                                                           | 0.525 (0.221)                   |
| Gender                                       | Four dummies indicating the gender configuration of the race                                                                                                                                                                                 | Winner / Runner up:<br>♂ / ♂<br>♂ / ♀<br>♀ / ♂<br>♀ / ♀                             | 63.59<br>17.21<br>15.46<br>3.74 |
| Incumbency                                   | Three dummies indicating who of the candidates (if any) was the incumbent                                                                                                                                                                    | Incumbent = ...<br>Winner 2016:<br>Runner up 2016:<br>Neither winner nor runner up: | 85.29%<br>2.00%<br>12.72%       |
| Incumbency in years                          |                                                                                                                                                                                                                                              |                                                                                     |                                 |
| Age difference                               | Age of the winner minus age of the runner up                                                                                                                                                                                                 | -35.66 / 49.29                                                                      | -5.871 (16.071)                 |
| Unemployment rate                            | In %                                                                                                                                                                                                                                         | 2.620 / 14.563                                                                      | 6.350 (1.931)                   |
| Senior-to-youth-rate                         | $\frac{\text{Share of seniors (> 60)}}{\text{Share of youth (<25)}}$                                                                                                                                                                         | 0.273 / 1.819                                                                       | 0.662 (0.193)                   |
| Males                                        | Male population in %                                                                                                                                                                                                                         | 45.437 / 52.637                                                                     | 49.237 (0.938)                  |
| Blacks                                       | Black population in %                                                                                                                                                                                                                        | 0.439 / 66.327                                                                      | 12.167 (13.493)                 |
| Hispanics                                    | Hispanic population in %                                                                                                                                                                                                                     | 0.954 / 87.616                                                                      | 17.434 (18.096)                 |
| Rental vacancy rate                          | Percentage of rental houses that is vacant                                                                                                                                                                                                   | 1.1 / 19.4                                                                          | 5.895 (2.412)                   |
| Median household income                      | In 1000 \$                                                                                                                                                                                                                                   | 31.789 / 120.089                                                                    | 58.219 (15.439)                 |
| Persons without health insurance             | In %                                                                                                                                                                                                                                         | 1.931 / 31.403                                                                      | 9.328 (4.427)                   |
| Persons with BA or higher                    | In %                                                                                                                                                                                                                                         | 9.1 / 71.5                                                                          | 30.357 (10.218)                 |
| District not safe                            | District has been rated as “not safe” (= leaning, likely or toss up) by at least one of the following predictions on November 7, 2016: Cook Political Report, Daily Kos Elections, the Rothenberg Political Report, and Real Clear Politics. | 14.46%                                                                              |                                 |
| Toss-up district                             | District has been rated as “toss-up” by at least one of the following predictions on November 7, 2016: Cook Political Report, Daily Kos Elections, the Rothenberg Political Report, and Real Clear Politics.                                 | 6.23%                                                                               |                                 |
| District with two candidates from same party | Two candidates from the same party received the most votes.                                                                                                                                                                                  | 2.99%                                                                               |                                 |
| Absolute margin Trump-Clinton                | Absolute difference between the percentage of votes for Donald Trump and Hilary Clinton at the presidential elections 2016; data from the Partisan Voting Index by the Cook Political Report 2017                                            | 0 / 87                                                                              | 26.484 (18.439)                 |
| Winner Republican                            | Dummy indicating whether the winner was a Republican                                                                                                                                                                                         | 56.36%                                                                              |                                 |
| Disbursement difference                      | $100 \cdot \frac{\text{total disbursement of the winner}}{\text{total disbursement of the winner} + \text{total disbursement of the runner up}}$<br>Data from the Federal Election Commission, campaign finance data.                        | 15.897 / 100                                                                        | 88.358 (16.785)                 |

## A8: Main models with influential cases excluded

|                                              | Model 1              | Model 2               | Model 3              | Model 4               |
|----------------------------------------------|----------------------|-----------------------|----------------------|-----------------------|
| Perceived physical appearance                |                      |                       |                      |                       |
| Attractiveness                               | 5.439***<br>(1.957)  | 5.457***<br>(1.516)   | 2.209<br>(1.733)     |                       |
| Competence                                   | 1.116<br>(2.153)     |                       | 1.392<br>(2.181)     | 5.822**<br>(2.257)    |
| Likability                                   | -1.746<br>(1.939)    |                       | 0.824<br>(1.956)     |                       |
| Gender                                       |                      |                       |                      |                       |
| Winner: female & Runner up: female           | -1.272<br>(2.067)    |                       | -0.810<br>(1.978)    |                       |
| Winner: male & Runner up: female             | 1.308<br>(0.920)     | 1.953**<br>(0.918)    | 1.002<br>(0.930)     |                       |
| Winner: female & Runner up: male             | -1.971*<br>(1.100)   | -2.916***<br>(1.007)  | -1.389<br>(1.113)    |                       |
| Incumbency                                   |                      |                       |                      |                       |
| Incumbent = runner up                        | -3.046<br>(2.420)    |                       | -2.255<br>(2.510)    |                       |
| Incumbent = no one                           | -2.621**<br>(1.041)  |                       | -2.773***<br>(1.055) |                       |
| Incumbency in years                          | 0.180***<br>(0.0436) | 0.164***<br>(0.0417)  | 0.176***<br>(0.0450) | 0.144***<br>(0.0466)  |
| Controls                                     |                      |                       |                      |                       |
| Age difference                               | -0.0228<br>(0.0260)  |                       | -0.0300<br>(0.0263)  | -0.0556**<br>(0.0257) |
| Unemployment rate                            | -0.819**<br>(0.326)  | -0.512**<br>(0.234)   | -0.761**<br>(0.314)  | -0.536**<br>(0.249)   |
| Senior-to-youth rate                         | 0.274<br>(2.172)     |                       | 0.673<br>(2.124)     |                       |
| Males %                                      | -1.443**<br>(0.594)  |                       | -1.347**<br>(0.587)  | -0.774*<br>(0.461)    |
| Blacks %                                     | 0.0759<br>(0.0509)   |                       | 0.0671<br>(0.0530)   |                       |
| Hispanics %                                  | 0.101**<br>(0.0425)  |                       | 0.0731*<br>(0.0396)  |                       |
| Rental vacancy rate                          | -0.0500<br>(0.177)   |                       | -0.0815<br>(0.176)   |                       |
| Median household income in 1000\$            | -0.0805*<br>(0.0446) |                       | -0.0572<br>(0.0452)  |                       |
| Persons without health insurance %           | -0.359**<br>(0.145)  | -0.193*<br>(0.103)    | -0.295*<br>(0.153)   |                       |
| Persons with BA or higher %                  | -0.0406<br>(0.0611)  | -0.131***<br>(0.0460) | -0.0618<br>(0.0625)  | -0.118**<br>(0.0484)  |
| District not safe                            | -1.917<br>(1.464)    | -2.648*<br>(1.435)    | -1.705<br>(1.438)    | -2.735*<br>(1.457)    |
| Toss-up district                             | 2.506<br>(1.881)     |                       | 2.505<br>(1.895)     |                       |
| District with two candidates from same party | -10.34***<br>(1.986) | -7.551***<br>(2.028)  | -9.562***<br>(1.900) | -9.317***<br>(2.098)  |
| Disbursement share winner                    | 0.222***<br>(0.0328) | 0.253***<br>(0.0313)  | 0.231***<br>(0.0330) | 0.229***<br>(0.0309)  |
| Absolute margin Trump-Clinton                | 0.718***<br>(0.0266) | 0.704***<br>(0.0238)  | 0.731***<br>(0.0284) | 0.729***<br>(0.0276)  |
| Winner: Republican                           | 2.950***<br>(1.075)  |                       | 3.413***<br>(1.072)  | 2.147**<br>(0.979)    |
| Constant                                     | 70.35**<br>(30.62)   | -4.687<br>(3.929)     | 63.20**<br>(29.90)   | 31.72<br>(23.58)      |
| Observations                                 | 376                  | 378                   | 376                  | 381                   |
| R-squared                                    | 0.849                | 0.827                 | 0.849                | 0.817                 |

Note: To test whether the most influential cases alter the main effects, all cases with a Cook's distance greater than 4/N were excluded from the models. Models 1 and 2 use the appearance-ratings from picture set 1 (regular background), models 3 and 4 those from picture set 2 (uniform background). Models 2 and 4 with stepwise backward selection. Robust standard errors in parentheses. \*\*\* p<0.01, \*\* p<0.05, \* p<0.1



## A9: Main models with standardized coefficients

|                                              | Model 1   | Model 2   | Model 3    | Model 4   |
|----------------------------------------------|-----------|-----------|------------|-----------|
| Perceived physical appearance                |           |           |            |           |
| Attractiveness                               | 0.176***  | 0.155***  | 0.122***   | 0.100***  |
| Competence                                   | 0.00947   |           | 0.0128     |           |
| Likability                                   | -0.0531   |           | -0.0176    |           |
| Gender                                       |           |           |            |           |
| Winner: female & Runner up: female           | 0.0136    |           | 0.0179     |           |
| Winner: male & Runner up: female             | 0.0610*   | 0.0664**  | 0.0524     | 0.0628*   |
| Winner: female & Runner up: male             | -0.102*** | -0.117*** | -0.0927*** | -0.103*** |
| Incumbency                                   |           |           |            |           |
| Incumbent = runner up                        | -0.0256   |           | -0.0196    |           |
| Incumbent = no one                           | -0.0370   |           | -0.0416    |           |
| Incumbency in years                          | 0.0307    |           | 0.0327     |           |
| Controls                                     |           |           |            |           |
| Age difference                               | 0.0679    | 0.0767*   | 0.0484     |           |
| Unemployment rate                            | -0.0726   |           | -0.0766    |           |
| Senior-to-youth rate                         | -0.0172   |           | -0.0163    |           |
| Males %                                      | -0.0436   |           | -0.0459    |           |
| Blacks %                                     | 0.0583    |           | 0.0504     |           |
| Hispanics %                                  | 0.0387    |           | 0.0366     |           |
| Rental vacancy rate                          | 0.00340   |           | 0.00410    |           |
| Median household income in 1000\$            | -0.0376   |           | -0.0261    |           |
| Persons without health insurance %           | -0.0162   |           | -0.0132    |           |
| Persons with BA or higher %                  | -0.0479   |           | -0.0553    |           |
| District not safe                            | -0.00997  |           | -0.00322   |           |
| Toss-up district                             | 0.0238    |           | 0.0251     |           |
| District with two candidates from same party | -0.101**  | -0.0927** | -0.0933**  | -0.0872** |
| Disbursement share winner                    | 0.268***  | 0.297***  | 0.280***   | 0.310***  |
| Absolute margin Trump-Clinton                | 0.658***  | 0.666***  | 0.664***   | 0.675***  |
| Winner: Republican                           | 0.0300    |           | 0.0414     |           |
| Observations                                 | 401       | 401       | 401        | 401       |
| R-squared                                    | 0.698     | 0.685     | 0.691      | 0.676     |

Note: Robust standardized coefficients. Models 1 and 2 use the appearance-ratings from picture set 1 (regular background), models 3 and 4 those from picture set 2 (uniform background). Models 2 and 4 with stepwise backward selection. \*\*\* p<0.01, \*\* p<0.05, \* p<0.1

## A10: Main models without “disbursement share winner”

|                                              | Model 1              | Model 2               | Model 3              | Model 4              |
|----------------------------------------------|----------------------|-----------------------|----------------------|----------------------|
| Perceived physical appearance                |                      |                       |                      |                      |
| Attractiveness                               | 13.35***<br>(3.976)  | 11.52***<br>(2.681)   | 9.085***<br>(3.235)  | 8.719***<br>(2.361)  |
| Competence                                   | 2.843<br>(3.796)     |                       | 2.669<br>(3.868)     |                      |
| Likability                                   | -5.136<br>(3.829)    |                       | -1.803<br>(3.679)    |                      |
| Gender                                       |                      |                       |                      |                      |
| Winner: female & Runner up: female           | 0.0106<br>(3.182)    |                       | 0.676<br>(3.086)     |                      |
| Winner: male & Runner up: female             | 2.165<br>(1.741)     |                       | 1.705<br>(1.753)     |                      |
| Winner: female & Runner up: male             | -5.306***<br>(1.786) | -6.217***<br>(1.533)  | -4.703**<br>(1.892)  | -5.459***<br>(1.605) |
| Incumbency                                   |                      |                       |                      |                      |
| Incumbent = runner up                        | -8.957**<br>(3.577)  | -10.50***<br>(3.287)  | -8.303**<br>(3.627)  | -8.888**<br>(3.542)  |
| Incumbent = no one                           | -4.250**<br>(1.752)  | -4.576***<br>(1.595)  | -4.633***<br>(1.744) | -4.391***<br>(1.635) |
| Incumbency in years                          | 0.0769<br>(0.0769)   |                       | 0.0792<br>(0.0779)   |                      |
| Controls                                     |                      |                       |                      |                      |
| Age difference                               | 0.0847<br>(0.0700)   | 0.105**<br>(0.0534)   | 0.0620<br>(0.0667)   | 0.0898*<br>(0.0527)  |
| Unemployment rate                            | -0.662<br>(0.492)    |                       | -0.720<br>(0.511)    |                      |
| Senior-to-youth rate                         | -2.719<br>(2.885)    |                       | -2.419<br>(2.895)    | -4.581*<br>(2.693)   |
| Males %                                      | -1.139<br>(0.873)    |                       | -1.189<br>(0.902)    | -1.091*<br>(0.637)   |
| Blacks %                                     | 0.0696<br>(0.0813)   |                       | 0.0591<br>(0.0865)   |                      |
| Hispanics %                                  | 0.0558<br>(0.0611)   |                       | 0.0563<br>(0.0615)   |                      |
| Rental vacancy rate                          | 0.155<br>(0.308)     |                       | 0.158<br>(0.313)     |                      |
| Median household income in 1000\$            | -0.0531<br>(0.0626)  | -0.0753**<br>(0.0317) | -0.0382<br>(0.0631)  | -0.0614*<br>(0.0324) |
| Persons without health insurance %           | -0.0333<br>(0.233)   |                       | -0.0179<br>(0.243)   |                      |
| Persons with BA or higher %                  | -0.0576<br>(0.104)   |                       | -0.0745<br>(0.106)   |                      |
| District not safe                            | -7.151***<br>(1.623) | -8.277***<br>(1.332)  | -7.164***<br>(1.596) | -8.271***<br>(1.372) |
| Toss-up district                             | -2.276<br>(2.065)    |                       | -2.338<br>(2.117)    |                      |
| District with two candidates from same party | -15.75***<br>(5.809) | -15.01***<br>(5.419)  | -14.99***<br>(5.704) | -14.77***<br>(5.430) |
| Absolute margin Trump-Clinton                | 0.707***<br>(0.0400) | 0.705***<br>(0.0347)  | 0.715***<br>(0.0405) | 0.716***<br>(0.0357) |
| Winner: Republican                           | 1.538<br>(1.510)     |                       | 2.089<br>(1.581)     | 2.233*<br>(1.321)    |
| Constant                                     | 72.61<br>(44.70)     | 14.66***<br>(2.272)   | 74.88<br>(45.95)     | 70.35**<br>(31.81)   |
| Observations                                 | 402                  | 402                   | 402                  | 402                  |
| R-squared                                    | 0.673                | 0.659                 | 0.663                | 0.655                |

Note: Robust standardized coefficients. Models 1 and 2 use the appearance-ratings from picture set 1 (regular background), models 3 and 4 those from picture set 2 (uniform background). Models 2 and 4 with stepwise backward selection. \*\*\* p<0.01, \*\* p<0.05, \* p<0.1

**A11: Interaction between incumbency and attractiveness (predicted values)**

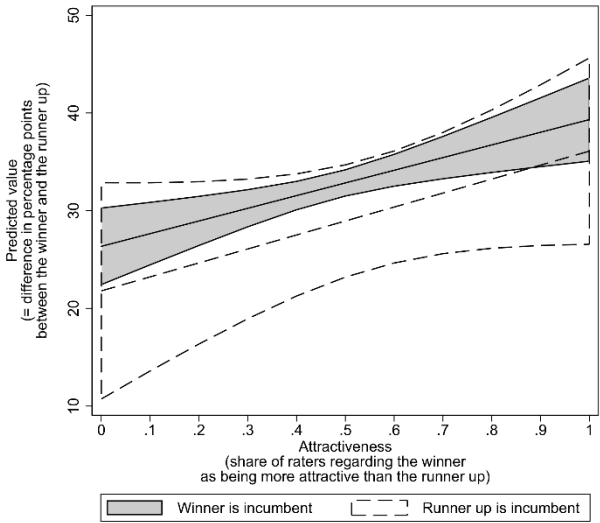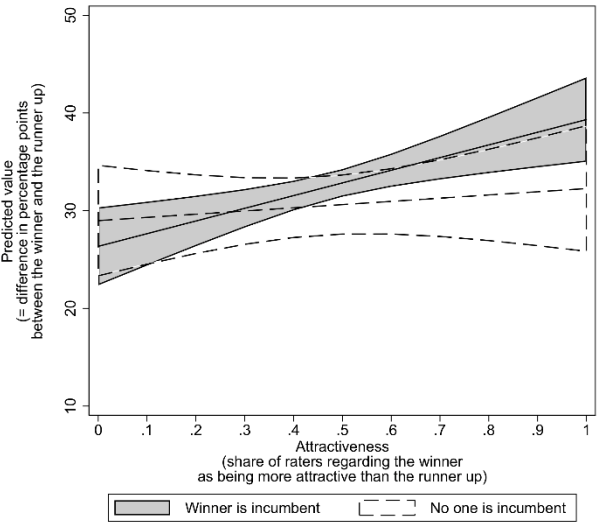

Supplement: Supplementary file 1 [file 17709875]
